# Supplementary material for: Phospholipid imbalance impairs autophagosome completion
Source: PubMed Central journal article supplement (PMC9713711; doi:10.15252/embj.2022110771), 2022-10-27
Supplement: EMBJ-41-e110771-s005.pdf [file EMBJ-41-e110771-s005.pdf]

## Table of contents to appendix figure S1

|                                                                                                     |   |
|-----------------------------------------------------------------------------------------------------|---|
| A- Acyl-chain length and composition of PG of WT and $\Delta opi3$ cells.....                       | 2 |
| B- Acyl-chain length and composition of PE of WT and $\Delta opi3$ cells.....                       | 2 |
| C- Acyl-chain length and composition of PA of WT and $\Delta opi3$ cells.....                       | 2 |
| D- Acyl-chain length and composition of PS of WT and $\Delta opi3$ cells.....                       | 2 |
| E- Acyl-chain length and composition of PI of WT and $\Delta opi3$ cells.....                       | 3 |
| F- Acyl-chain length and composition of PMME of WT and $\Delta opi3$ cells .....                    | 3 |
| G- Acyl-chain length and composition of PC of WT and $\Delta opi3$ cells.....                       | 3 |
| H- Schematics of the procedure for lipidomic analysis of autophagic membranes.....                  | 4 |
| I- Acyl-chain length and composition of PI of $\Delta ypt7$ and $\Delta opi3\Delta ypt7$ cells..... | 4 |
| J- Acyl-chain length and composition of PS of $\Delta ypt7$ and $\Delta opi3\Delta ypt7$ cells..... | 4 |
| K- Acyl-chain length and composition of PG of $\Delta ypt7$ and $\Delta opi3\Delta ypt7$ cells..... | 4 |
| L- Acyl-chain length and composition of PG of $\Delta ypt7$ and $\Delta opi3\Delta ypt7$ cells..... | 4 |
| Legend to appendix figure S1.....                                                                   | 5 |

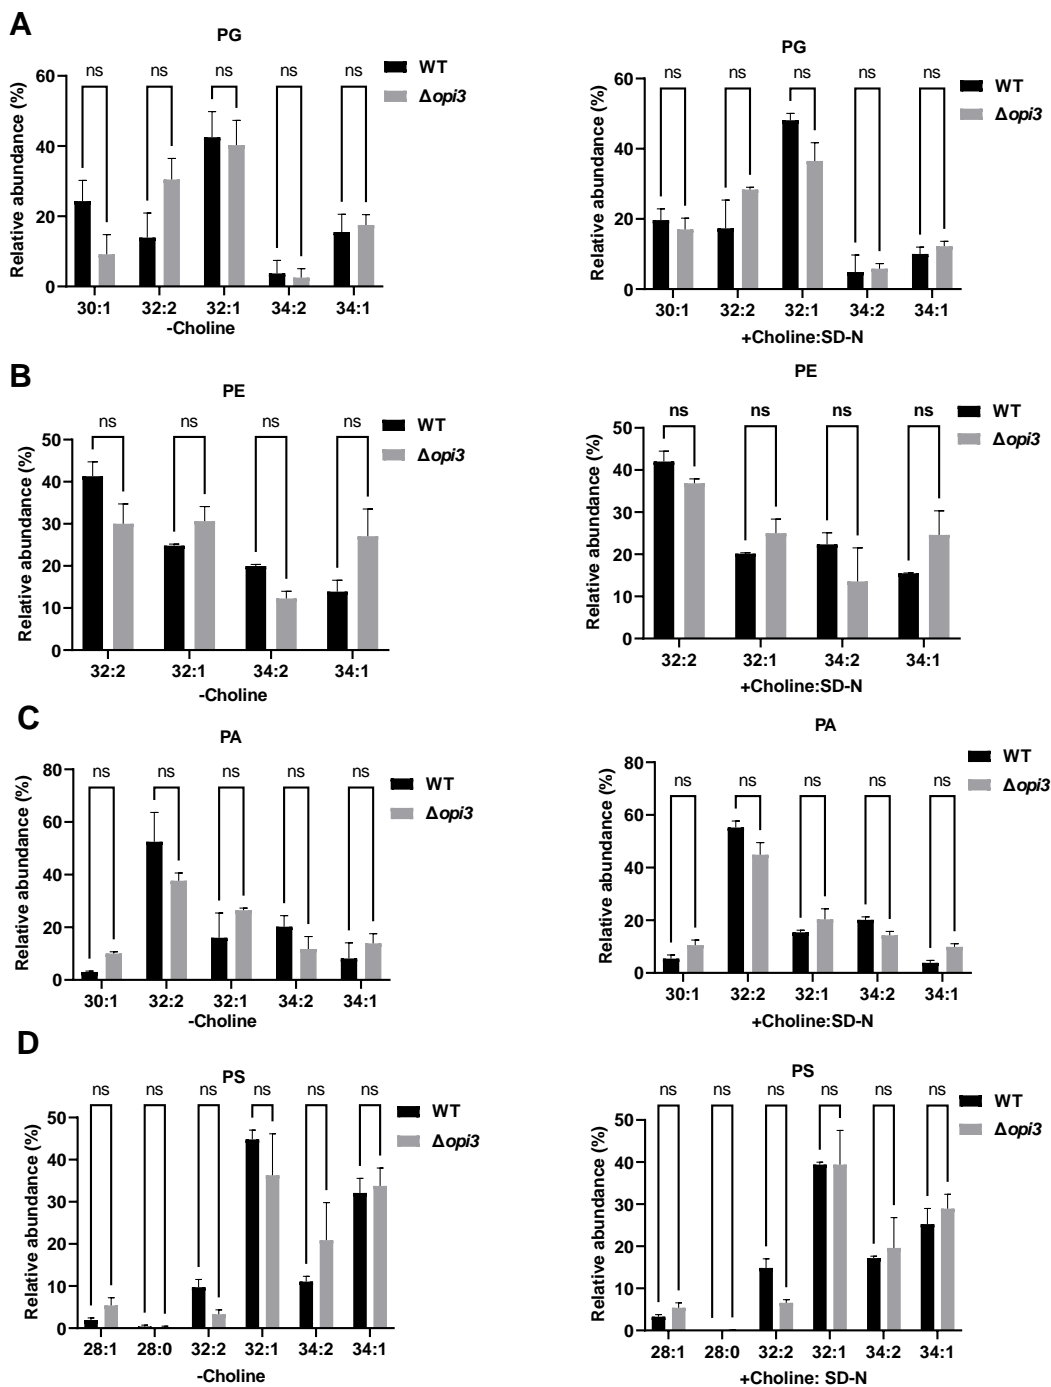

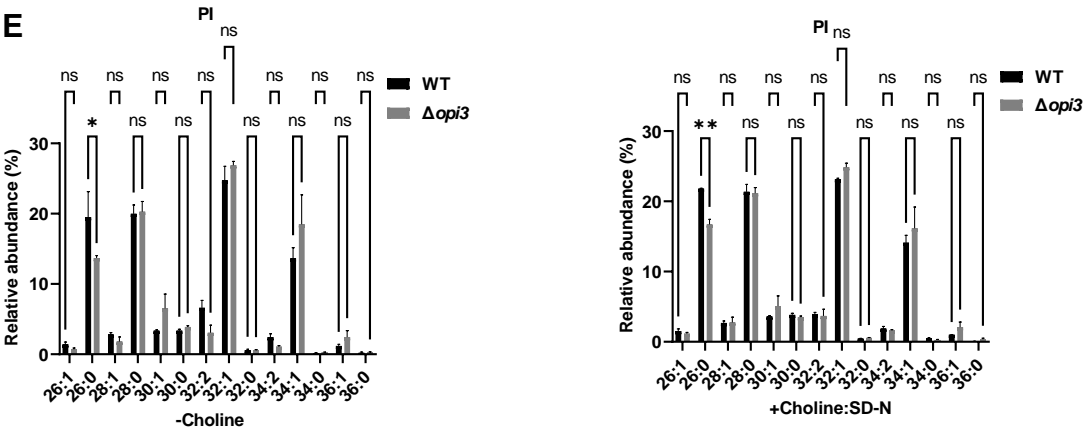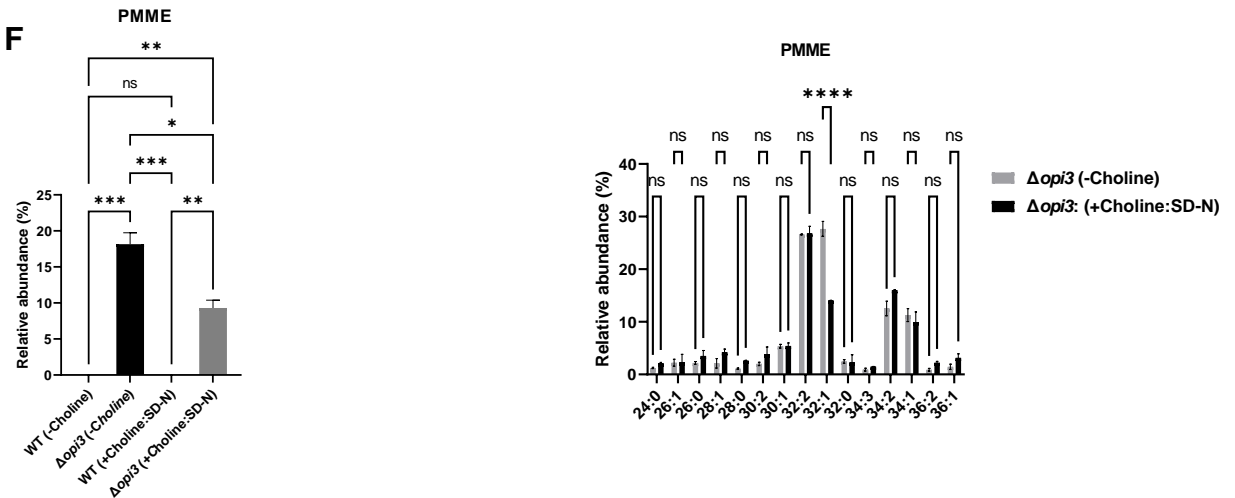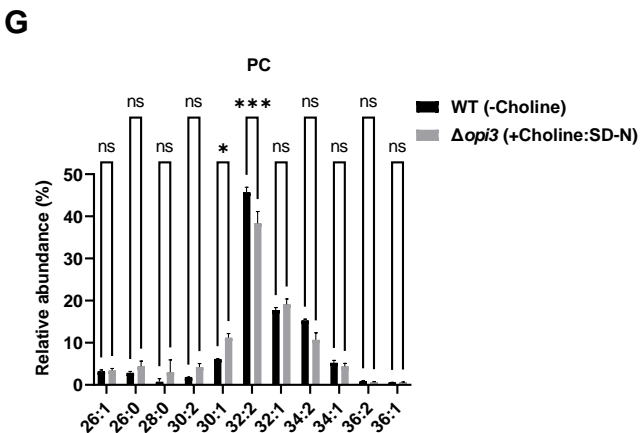

**H** Yeast cells → Lysis → Pellet → IP GFP magnetic beads → Lipidomics of Atg8 membranes

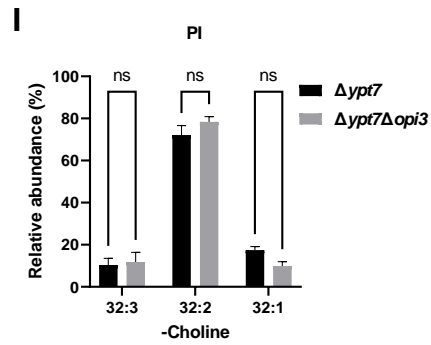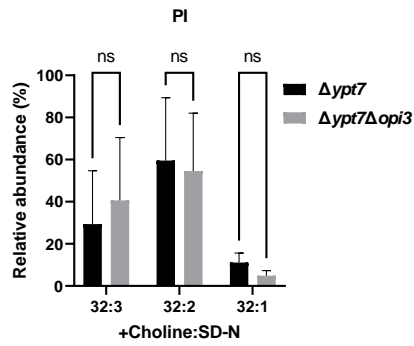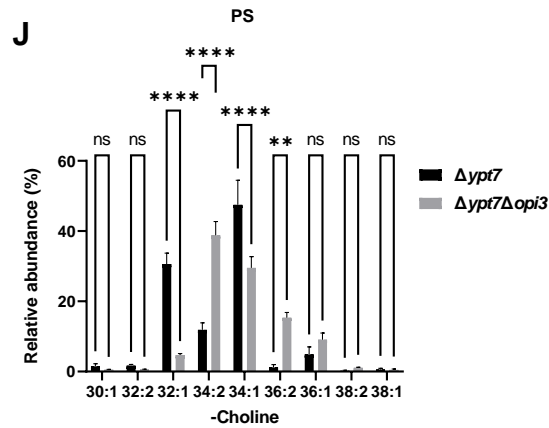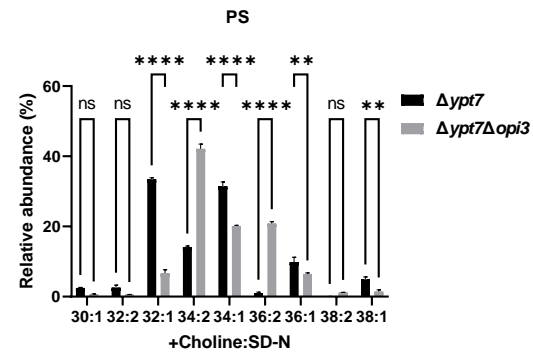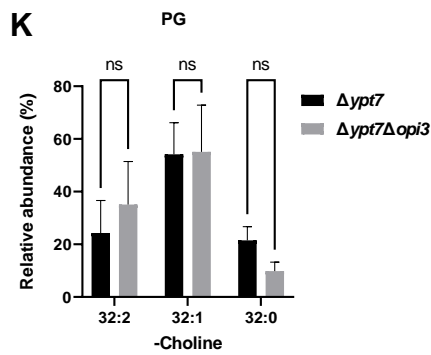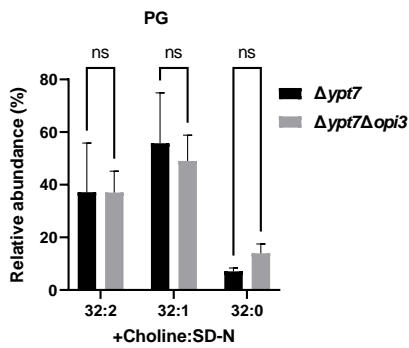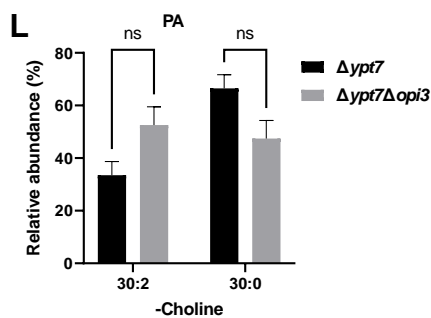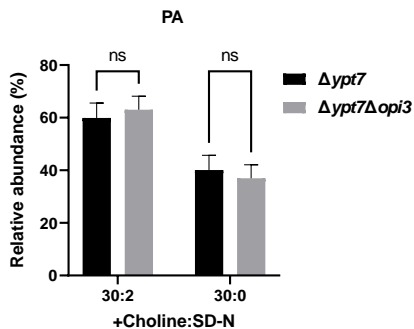

### Appendix figure S1: Addition of choline to $\Delta opi3$ cells specifically restores PC levels

A-G. Phospholipids species of WT and  $\Delta opi3$  cells. Shown are acyl-chain length and composition of PG (A), PE (B), PA (C), PS (D), PI (E), PMME (F), and PC (G). Cells were grown in SD-URA, and starved for 4 h in SD-N, with choline (1 mM) supplementation excluded (-choline) or during starvation (+choline: SD-N) as indicated, harvested and analyzed by shotgun lipidomics. Statistical analysis was done by Anova multiple comparisons test- Sidak's (\*\*\*\*,  $p \leq 0.0001$ , \*\*,  $p \leq 0.005$ , \*,  $p \leq 0.001$ , ns- not significant), error bars represent SEM (n=3, except for PE, PMME and WT with choline, n=2). For PMME (F- left panel)- Tucky's multiple comparison test.

H. Schematics of the procedure for lipidomic analysis of autophagic membranes. GFP-Atg8 expressing cells were lysed, Atg8-positive membranes were isolated from membrane fraction by GFP magnetic beads, and analyzed by shotgun lipidomics for lipid composition.

I-L: Phospholipids species of  $\Delta ypt7$  and  $\Delta ypt7 \Delta opi3$  cells. Shown are acyl chain length and composition of PI (I), PS (J), PG (K), PA (L). Cells expressing GFP-Atg8 were grown to log phase in SD-URA, and shifted to starvation medium. Cells were harvested after 3 h of starvation, lysed and membrane fraction was immunoprecipitated with GFP-magnetic beads. Atg8 enriched membranes were eluted and analyzed by shotgun lipidomics. Statistical analysis was done by Anova multiple comparisons test- Sidak's (\*\*\*\*,  $p \leq 0.0001$ , \*\*,  $p \leq 0.005$ , ns- not significant), error bars represent SEM of 3 independent experiments.
